# Supplementary figures and images for: Melatonin Supplementation and Outcomes After Assisted Reproductive Technology: A Systematic Review and Meta-analyses
Source: Research Square preprint supplement (doi:10.21203/rs.3.rs-88552/v1), 2020-10-12

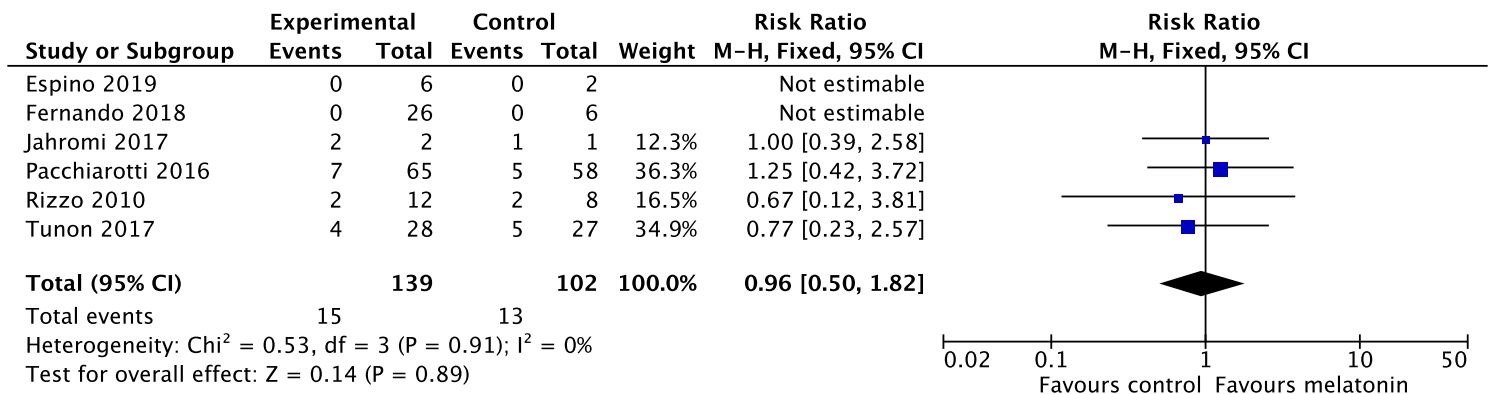

meta-analysis of studies reporting miscarriage rate

Supplement: Supplementary file 1 [file a7f28c7e1b796482fa30edb5.pdf]
